# Supplementary material for: Selective Formation of Intramolecular Hydrogen-Bonding Palladium(II) Complexes with Nucleosides Using Unsymmetrical Tridentate Ligands
Source: MDPI journal article supplement (doi:10.3390/molecules27072098), 2022-03-24
Supplement: s1 [file s1]

## Supporting Information

# Selective Formation of Intermolecular Hydrogen-bonding Palladium(II) Complexes with Nucleosides Using Unsymmetrical Tridentate Ligands

Ryoji Mitsuhashi,<sup>1,\*</sup> Yuya Imai,<sup>2</sup> Takayoshi Suzuki,<sup>3</sup> Yoshihito Hayashi<sup>2</sup>

<sup>1</sup> Institute of Liberal Arts and Science, Kanazawa University; Kakuma, Kanazawa, Ishikawa 920-1192, Japan

<sup>2</sup> Department of Chemistry, Kanazawa University; Kakuma, Kanazawa, Ishikawa 920-1192, Japan

<sup>3</sup> Institute for Interdisciplinary Science, Okayama University, 3-1-1 Tsushima-naka, Okayama, 700-8530, Japan

E-mail mitsuhashi@staff.kanazawa-u.ac.jp

Contents:

### 1. X-Ray crystallography

**Table S1.** Hydrogen-bond distances and angles.

### 2. <sup>1</sup>H NMR Spectroscopy

**Figure S1.** <sup>1</sup>H NMR spectra of (a) reaction mixture of **1** in CD<sub>3</sub>OD.

**Figure S2.** <sup>1</sup>H NMR spectra of (a) reaction mixture of **1'** in CD<sub>3</sub>OD.

**Figure S3.** <sup>1</sup>H NMR spectra of (a) reaction mixture of **2** in CD<sub>3</sub>CN.

**Figure S4.** <sup>1</sup>H NMR spectra of (a) reaction mixture of **1** and cytidine, and (b) cytidine in CD<sub>3</sub>OD.

**Figure S5.** <sup>1</sup>H NMR spectra of (a) reaction mixture of **1** and 5-methyluridine, (b) **1**, 5-methyluridine and triethylamine, and (c) 5-methyluridine in CD<sub>3</sub>OD.

**Figure S6.** <sup>1</sup>H NMR spectra of (a) reaction mixture of **1** and adenosine, (b) adenosine in CD<sub>3</sub>OD.

**Figure S7.** <sup>1</sup>H NMR spectra of (a) reaction mixture of **1** and guanosine, (b) guanosine in CD<sub>3</sub>OD.

## 1. X-Ray crystallography

**Table S1.** Hydrogen-bond distances and angles.

|           | D–H···A |     |                   | D–H / Å   | H···A / Å | D···A / Å  | D–H···A / ° |
|-----------|---------|-----|-------------------|-----------|-----------|------------|-------------|
| <b>1</b>  | N2      | H2A | O2 <sup>i</sup>   | 0.91      | 1.95      | 2.8609(18) | 177.1       |
|           | O3      | H3A | O1                | 0.975(19) | 1.82(2)   | 2.785(2)   | 169(4)      |
| <b>1'</b> | N2      | H2A | O2 <sup>ii</sup>  | 0.91      | 2.07      | 2.969(3)   | 171.9       |
|           | N2      | H2B | O2 <sup>iii</sup> | 0.91      | 2.06      | 2.904(3)   | 153.3       |
| <b>2</b>  | O1      | H1  | O2                | 0.84      | 1.87      | 2.608(6)   | 146.7       |
|           | N2      | H2A | O3 <sup>iv</sup>  | 0.91      | 2.24      | 3.078(7)   | 153.1       |
|           | O3      | H3A | O4                | 0.84      | 1.86      | 2.595(6)   | 146.0       |
|           | N5      | H5A | O1                | 0.91      | 2.18      | 2.974(5)   | 145.3       |

Symmetry code: (i = '–x+1, y–1/2, –z+3/2', ii = 'x, –y+1/2, z+1/2', iii = '–x+1, y+1/2, –z+1/2', iv = x–1, y–1, z+1).

## 2. $^1\text{H}$ NMR Spectroscopy

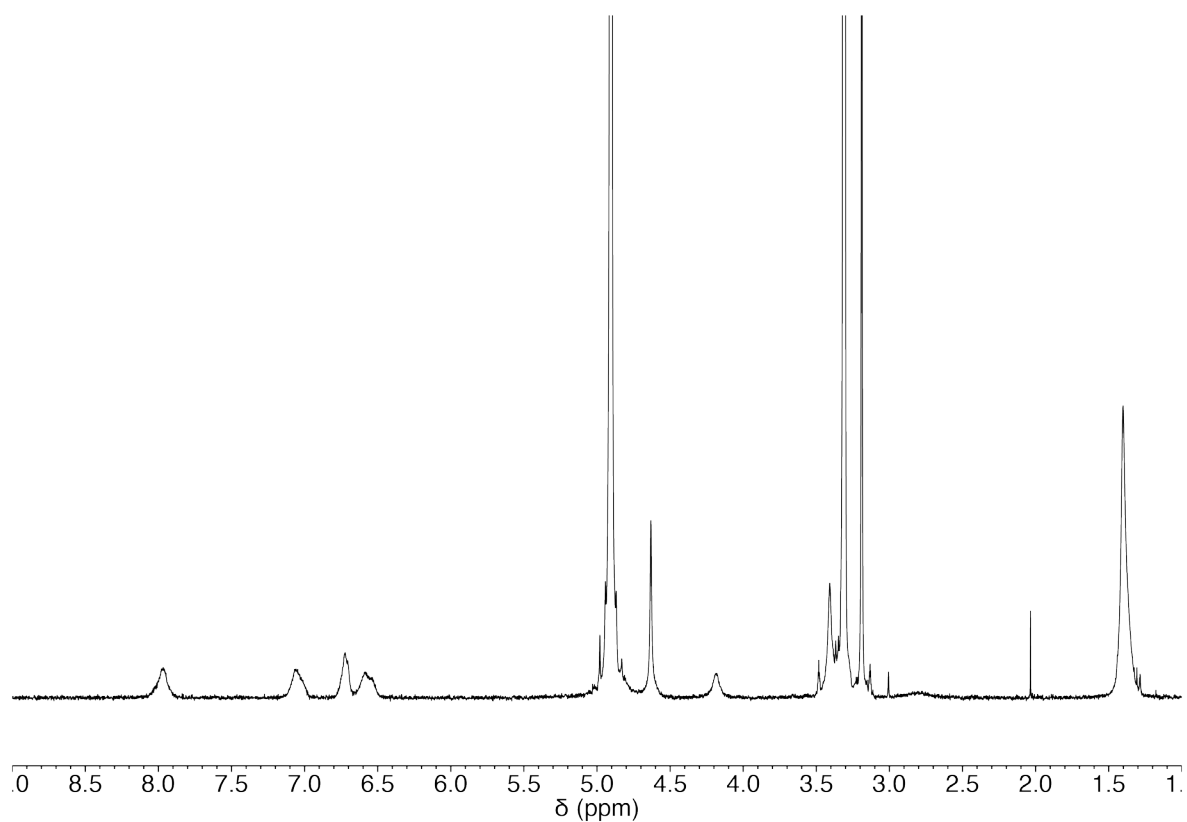

**Figure S1.**  $^1\text{H}$  NMR spectra of (a) reaction mixture of **1** in  $\text{CD}_3\text{OD}$ .

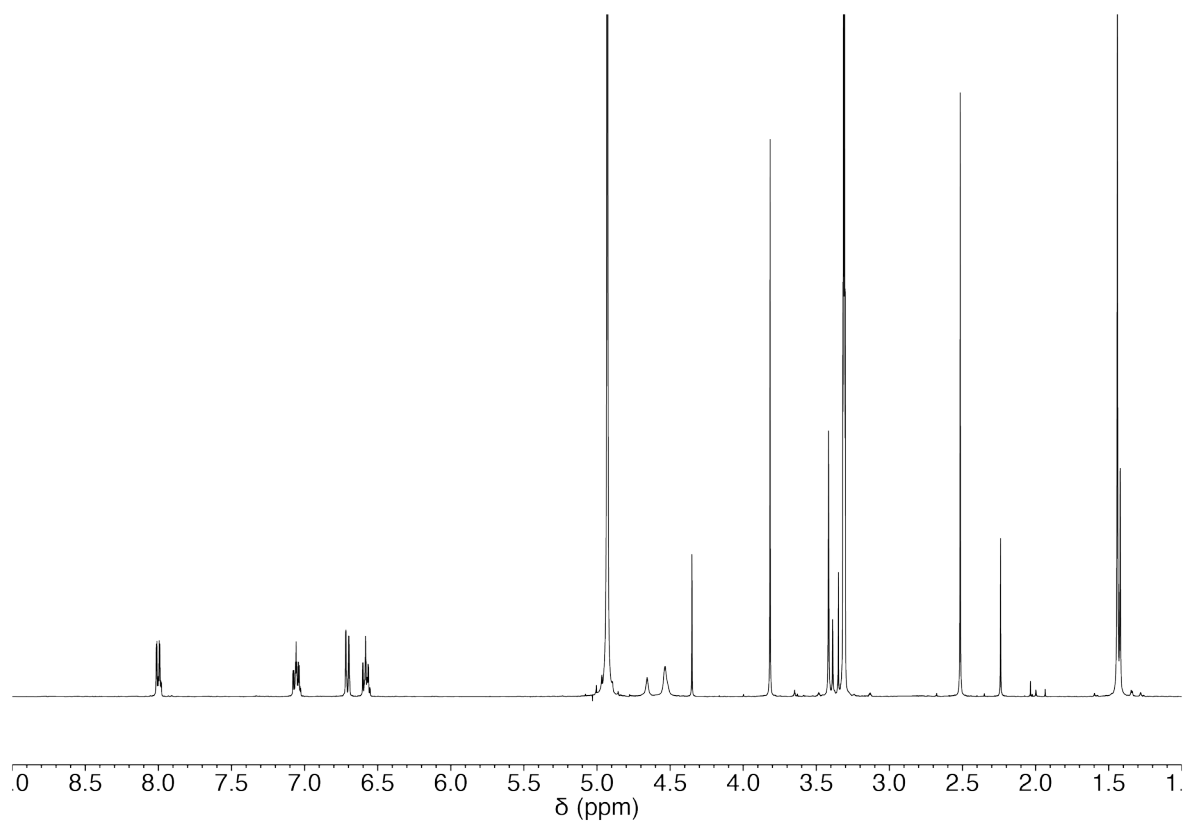

**Figure S2.**  $^1\text{H}$  NMR spectra of (a) reaction mixture of **1'** in  $\text{CD}_3\text{OD}$ .

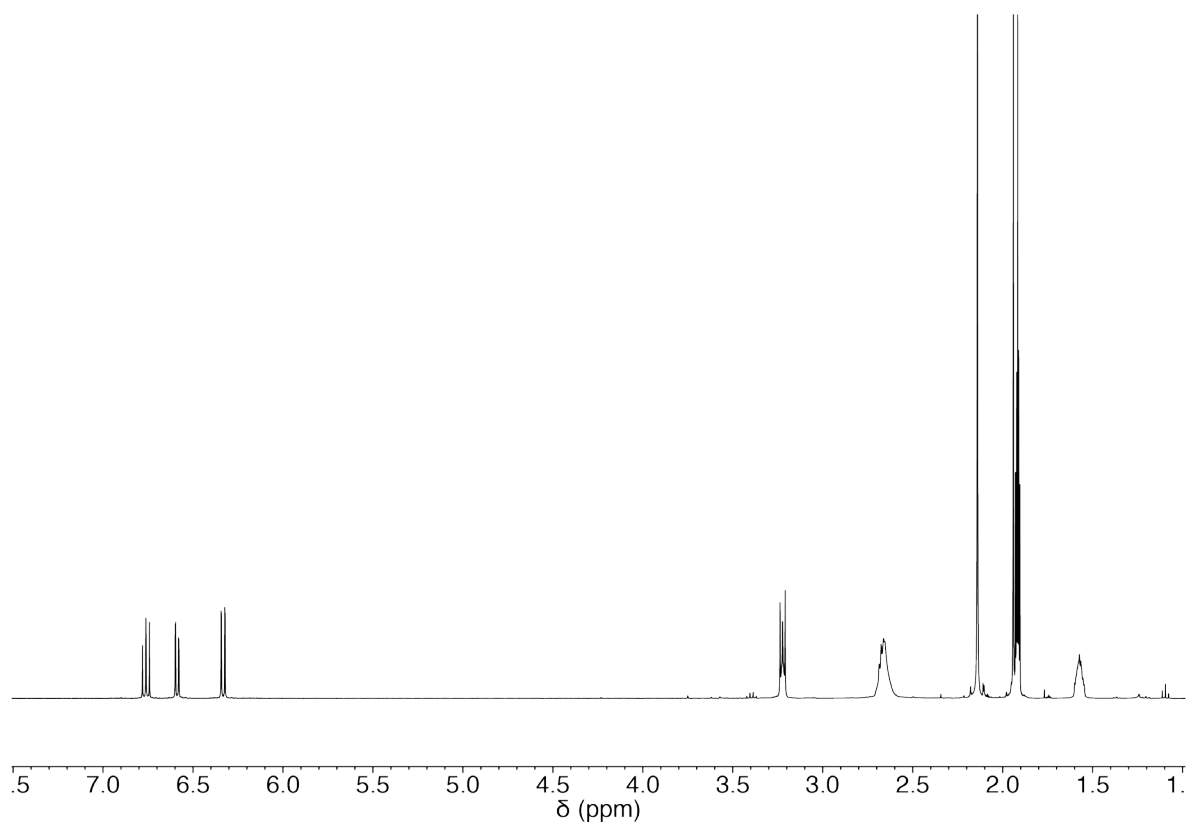

**Figure S3.**  $^1\text{H}$  NMR spectra of (a) reaction mixture of **2** in  $\text{CD}_3\text{CN}$ .

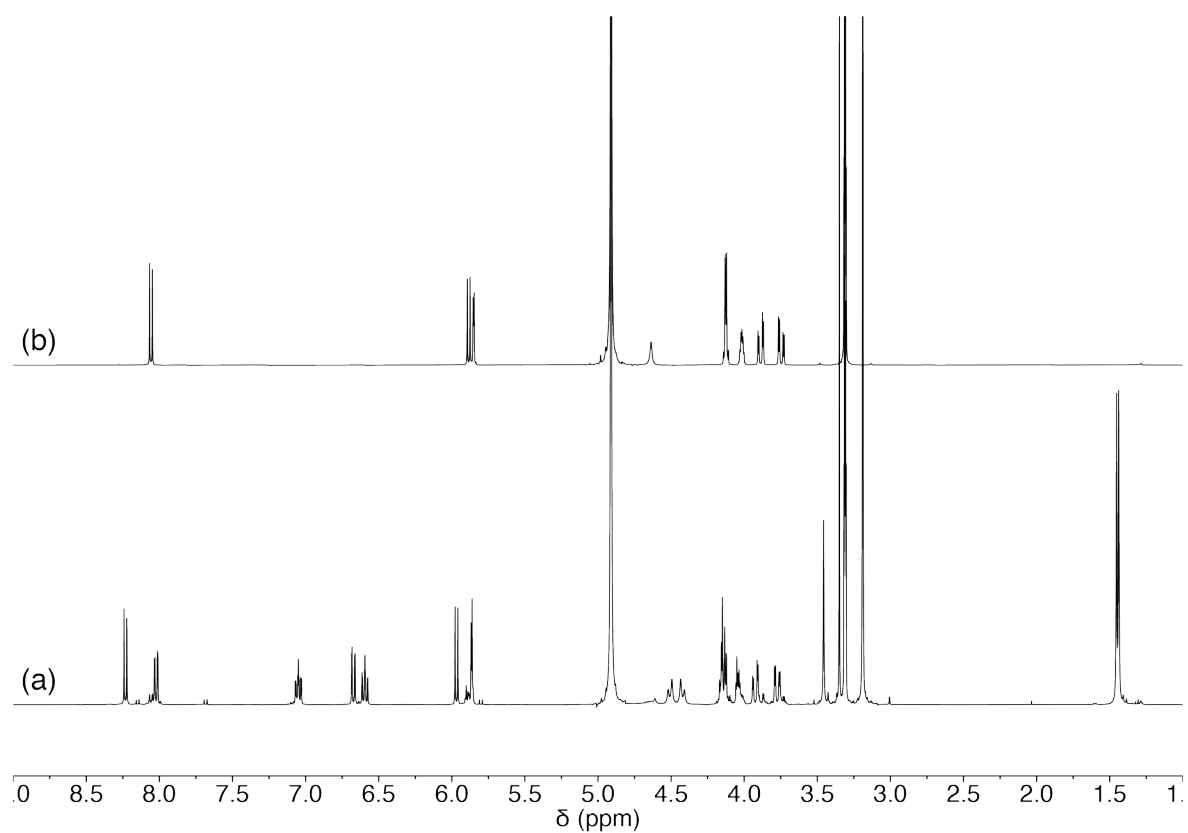

**Figure S4.**  $^1\text{H}$  NMR spectra of (a) reaction mixture of **1** and cytidine, and (b) cytidine in  $\text{CD}_3\text{OD}$ .

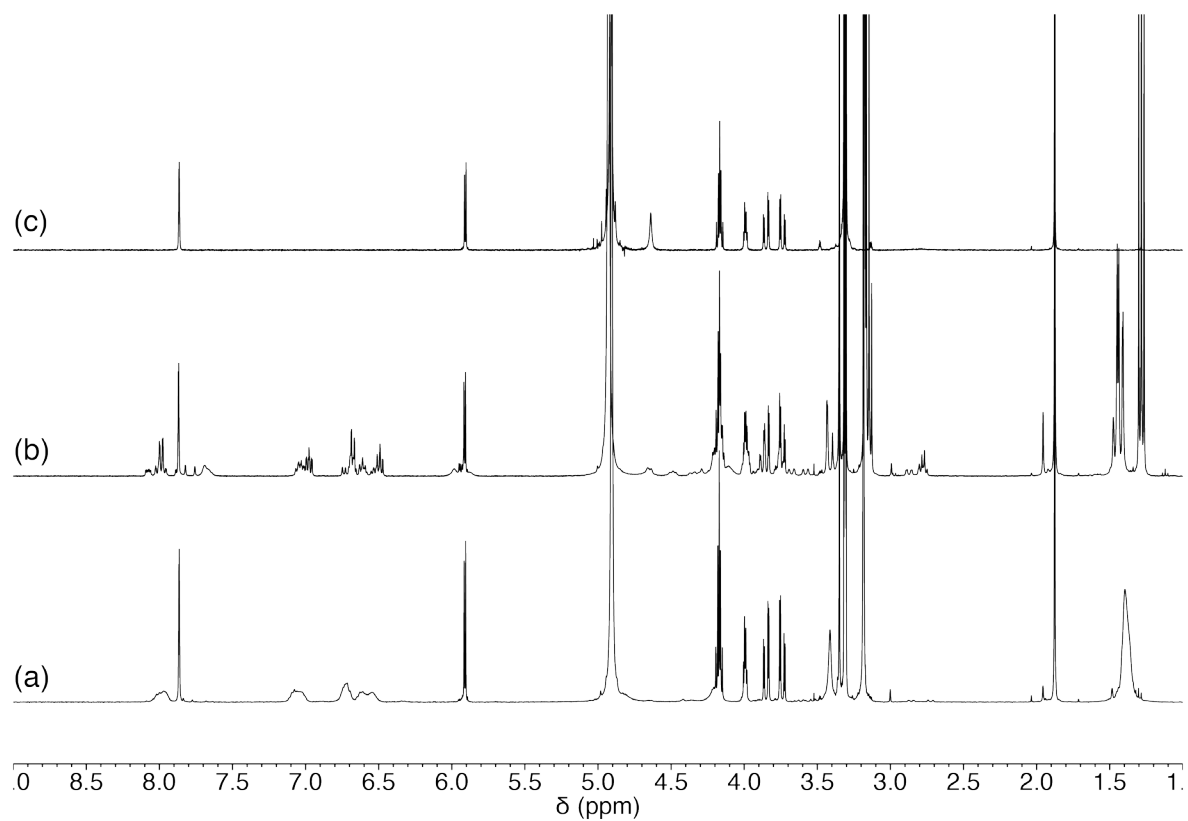

**Figure S5.**  $^1\text{H}$  NMR spectra of (a) reaction mixture of **1** and 5-methyluridine, (b) **1**, 5-methyluridine and triethylamine, and (c) 5-methyluridine in  $\text{CD}_3\text{OD}$ .

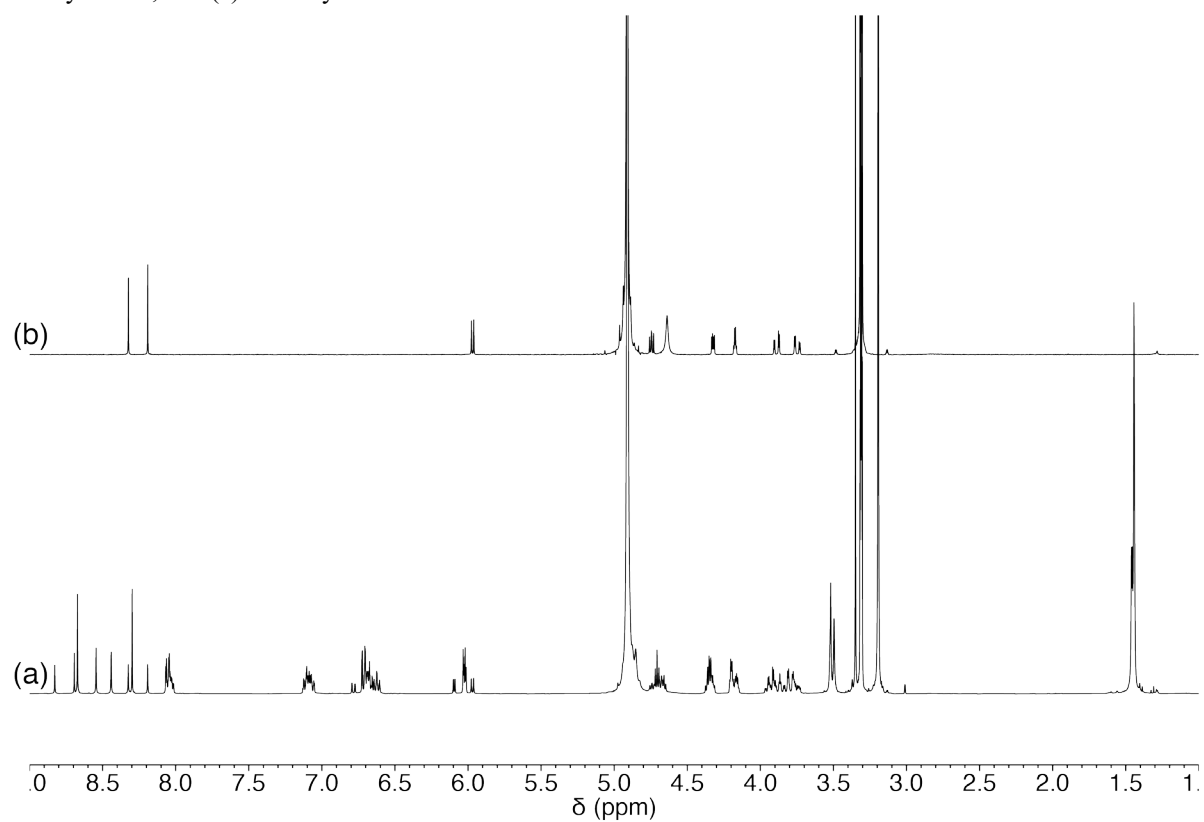

**Figure S6.**  $^1\text{H}$  NMR spectra of (a) reaction mixture of **1** and adenosine, (b) adenosine in  $\text{CD}_3\text{OD}$ .

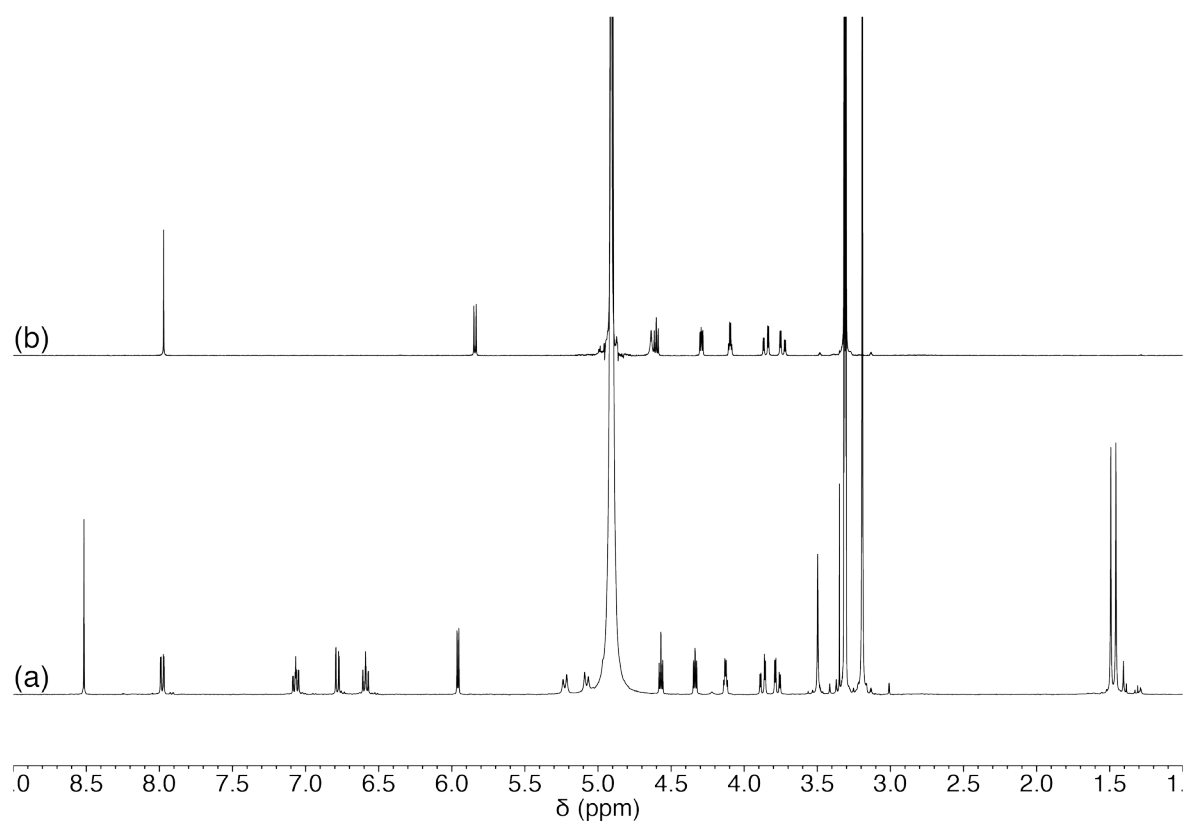

**Figure S7.**  $^1\text{H}$  NMR spectra of (a) reaction mixture of **1** and guanosine, (b) guanosine in  $\text{CD}_3\text{OD}$ .
